# Supplementary material for: Experimental Neuromyelitis Optica Induces a Type I Interferon Signature in the Spinal Cord
Source: PubMed Central journal article supplement (PMC4798752; doi:10.1371/journal.pone.0151244), 2016-03-18
Supplement: pone.0151244.s001.pdf [file pone.0151244.s001.pdf]

**S1 Table. Immunologically relevant proteins among the 366 upregulated gene products with GenBank accession numbers, grouped according to GO Term pathway analysis.**

**GO Term “immune response”:**

| <b>GENBANK_ACCESSION</b> | <b>GENE NAME</b>                                                                                                              |
|--------------------------|-------------------------------------------------------------------------------------------------------------------------------|
| NM_138913                | 2'-5' oligoadenylate synthetase 1A                                                                                            |
| XM_001053627             | Fc fragment of IgE, high affinity I, receptor for; gamma polypeptide                                                          |
| NM_001100836             | Fc fragment of IgG, high affinity Ia, receptor (CD64)                                                                         |
| M64368                   | Fc fragment of IgG, low affinity IIb, receptor (CD32); Fc fragment of IgG, low affinity IIa, receptor (CD32)                  |
| NM_001008829             | RT1 class I, CE14; RT1 class I, CE16; RT1 class Ia, locus A2; RT1 class Ib, locus Cl; RT1 class Ia, locus A1; RT1 class I, A3 |
| NM_001008840             | RT1 class I, CE2                                                                                                              |
| NM_001008841             | RT1 class I, CE3                                                                                                              |
| AJ004888                 | RT1 class Ib, locus Aw2                                                                                                       |
| NM_001048045             | RT1 class Ib, locus M5                                                                                                        |
| NM_019262                | complement component 1, q subcomponent, beta polypeptide                                                                      |
| NM_001077642             | complement factor D (adipsin)                                                                                                 |
| NM_133624                | guanylate binding protein 2                                                                                                   |
| NM_012968                | interleukin 1 receptor accessory protein                                                                                      |
| NM_012854                | interleukin 10                                                                                                                |
| NM_022634                | leukocyte specific transcript 1                                                                                               |
| NM_001108076             | myosin IF                                                                                                                     |
| NM_001106031             | nucleoside phosphorylase                                                                                                      |
| NM_012708                | proteasome (prosome, macropain) subunit, beta type 9 (large multifunctional peptidase 2)                                      |
| NM_053908                | protein tyrosine phosphatase, non-receptor type 6                                                                             |
| NM_017160                | ribosomal protein S6; similar to 40S ribosomal protein S6                                                                     |
| NM_199093                | serine (or cysteine) peptidase inhibitor, clade G, member 1                                                                   |
| AF436847                 | similar to complement factor H-related protein                                                                                |

| <b>GENBANK_ACCESSION</b> | <b>GENE NAME</b>                        |
|--------------------------|-----------------------------------------|
| NM_138533                | spondin 2, extracellular matrix protein |
| NM_172328                | tachykinin 4                            |
| NM_198769                | toll-like receptor 2                    |

**GO Term “antigen processing and presentation”:**

| <b>GENBANK_ACCESSION</b> | <b>GENE NAME</b>                                                                                                              |
|--------------------------|-------------------------------------------------------------------------------------------------------------------------------|
| XM_001053627             | Fc fragment of IgE, high affinity I, receptor for; gamma polypeptide                                                          |
| NM_001100836             | Fc fragment of IgG, high affinity Ia, receptor (CD64)                                                                         |
| M64368                   | Fc fragment of IgG, low affinity IIb, receptor (CD32); Fc fragment of IgG, low affinity IIa, receptor (CD32)                  |
| M64368                   | Fc gamma receptor II beta                                                                                                     |
| NM_001008829             | RT1 class I, CE14; RT1 class I, CE16; RT1 class Ia, locus A2; RT1 class Ib, locus Cl; RT1 class Ia, locus A1; RT1 class I, A3 |
| NM_001008840             | RT1 class I, CE2                                                                                                              |
| NM_001008841             | RT1 class I, CE3                                                                                                              |
| AJ004888                 | RT1 class Ib, locus Aw2                                                                                                       |
| NM_001048045             | RT1 class Ib, locus M5                                                                                                        |
| NM_001030026             | interferon gamma inducible protein 30                                                                                         |
| NM_012708                | proteasome (prosome, macropain) subunit, beta type 9 (large multifunctional peptidase 2)                                      |

**GO Term “regulation of immune effector processes”:**

| <b>GENBANK_ACCESSION</b> | <b>GENE NAME</b>                                                                                      |
|--------------------------|-------------------------------------------------------------------------------------------------------|
| XM_001053627             | Fc fragment of IgE, high affinity I, receptor for; gamma polypeptide                                  |
| NM_001100836             | Fc fragment of IgG, high affinity Ia, receptor (CD64)                                                 |
| M64368                   | Fc fragment of IgG, low affinity IIb, receptor (CD32); Fc fragment of IgG, low affinity IIa, receptor |

**GENBANK\_ACCESSION**

M64368  
NM\_001008829  
NM\_012488  
NM\_012854  
NM\_001106031  
NM\_053908  
NM\_199093  
AF436847

**GENE NAME**

(CD32)

Fc gamma receptor II beta  
RT1 class I, CE14; RT1 class I, CE16; RT1 class Ia, locus A2; RT1 class Ib, locus Cl; RT1 class Ia, locus A1; RT1 class I, A3  
alpha-2-macroglobulin  
interleukin 10  
nucleoside phosphorylase  
protein tyrosine phosphatase, non-receptor type 6  
serine (or cysteine) peptidase inhibitor, clade G, member 1  
similar to complement factor H-related protein

**GO Term "positive regulation of immune responses":****GENBANK\_ACCESSION**

XM\_001053627  
NM\_001100836  
M64368  
M64368  
NM\_001008829  
NM\_019262  
NM\_001077642  
NM\_001106031  
NM\_053908  
NM\_199093  
AF436847  
NM\_198769

**GENE NAME**

Fc fragment of IgE, high affinity I, receptor for; gamma polypeptide  
Fc fragment of IgG, high affinity Ia, receptor (CD64)  
Fc fragment of IgG, low affinity IIb, receptor (CD32); Fc fragment of IgG, low affinity IIa, receptor (CD32)  
Fc gamma receptor II beta  
RT1 class I, CE14; RT1 class I, CE16; RT1 class Ia, locus A2; RT1 class Ib, locus Cl; RT1 class Ia, locus A1; RT1 class I, A3  
complement component 1, q subcomponent, beta polypeptide  
complement factor D (adipsin)  
nucleoside phosphorylase  
protein tyrosine phosphatase, non-receptor type 6  
serine (or cysteine) peptidase inhibitor, clade G, member 1  
similar to complement factor H-related protein  
toll-like receptor 2

**GO Term “defense response”:**

**GENBANK\_ACCESSION**

XM\_001053627

NM\_001100836

M64368

NM\_031634

NM\_012488

NM\_001108452

NM\_019262

NM\_001077642

NM\_013185

NM\_012968

NM\_012854

NM\_001025420

NM\_001108076

NM\_053908

NM\_031531

NM\_199093

AF436847

NM\_198769

**GENE NAME**

Fc fragment of IgE, high affinity I, receptor for; gamma polypeptide

Fc fragment of IgG, high affinity Ia, receptor (CD64)

Fc fragment of IgG, low affinity IIb, receptor (CD32); Fc fragment of IgG, low affinity IIa, receptor (CD32)

Mediterranean fever

alpha-2-macroglobulin

coactosin-like 1 (Dictyostelium)

complement component 1, q subcomponent, beta polypeptide

complement factor D (adipsin)

hemopoietic cell kinase

interleukin 1 receptor accessory protein

interleukin 10

lymphocyte-specific protein 1

myosin IF

protein tyrosine phosphatase, non-receptor type 6

serine (or cysteine) peptidase inhibitor, clade A, member 3N

serine (or cysteine) peptidase inhibitor, clade G, member 1

similar to complement factor H-related protein

toll-like receptor 2
