# Supplementary material for: Experimental Neuromyelitis Optica Induces a Type I Interferon Signature in the Spinal Cord
Source: PubMed Central journal article supplement (PMC4798752; doi:10.1371/journal.pone.0151244), 2016-03-18
Supplement: pone.0151244.s002.pdf [file pone.0151244.s002.pdf]

**S2 Table. Differentially expressed immunologically relevant genes upregulated in spinal cords of Lewis rats with experimental neuromyelitis optica**

| Target Id    | fc ENMO/ EAE | fc all T / all non-T | Gene symbol     | major function                                                                                                                     | Ref.    |
|--------------|--------------|----------------------|-----------------|------------------------------------------------------------------------------------------------------------------------------------|---------|
| NM_031085    | 432.4        | 72.4                 | Prkch           | protein kinase C eta; down-regulated through immune responses                                                                      | [1]     |
| NM_001108076 | 14.9         | 11.4                 | Myo1f_predicted | unconventional myosin type 1F; fusion partner in infant acute monocytic leukemia;                                                  | [2]     |
| NM_021989    | 13.9         | 1.2                  | Timp2           | tissue inhibitor of metalloproteinase 2; constitutively expressed in astrocytes and serum exposed microglia                        | [3,4]   |
| NM_001077642 | 11.8         | 4.3                  | Cfd             | complement factor D (adipsin); alternative complement pathway; found in astroglioma                                                | [5]     |
| NM_012488    | 7.8          | 0.9                  | A2m             | alpha-2-macroglobulin; broad spectrum protease-binding protein; leads to protease clearance; acute phase protein, induced by IL-6. | [6] [7] |
| NM_019262    | 7.6          | 3.7                  | C1qb            | complement factor C1qb; classical pathway; found in microglia and macrophages                                                      | [8,9]   |
| NM_001100836 | 7.5          | 14.2                 | Fcgr1           | Fc receptor, IgG, high affinity I;                                                                                                 | [10]    |

|                           |            |            |                           |                                                                                                                                                                              |         |
|---------------------------|------------|------------|---------------------------|------------------------------------------------------------------------------------------------------------------------------------------------------------------------------|---------|
| NM_001106586              | 6.8        | 3.1        | Irf5_predicted            | interferon regulatory factor 5 (predicted); highly expressed in M1 macrophages; promotes polarization of inflammatory macrophages and TH1-TH17 responses.                    | [11]    |
| NM_001108452              | 6.4        | 1.4        | Cotl1_predicted           | coactosin-like 1; stabilizes 5-lipoxygenase and thus promotes synthesis of pro-inflammatory leukotrienes; found on certain types of Fcgr3 expressing neutrophils;            | [12,13] |
| NM_031657                 | 6.4        | 1.2        | Grk6                      | G protein-coupled receptor kinase 6; intracellular kinase; regulates sensitivity of G-protein coupled receptors including those involved in migration of inflammatory cells. | [14]    |
| NM_001107578              | 5.9        | 0.7        | Ms4a1_predicted           | membrane-spanning 4-domains, subfamily A, member 1, predicted; = CD20; expressed on B cells                                                                                  |         |
| NM_001030026              | 5.6        | 5.1        | Ifi30                     | interferon gamma inducible protein 30; = Gamma-interferon-inducible lysosomal thiol reductase (GILT); found among top 20 upregulated genes in NMO lesions                    | [15]    |
| <b>ENSRNOT00000045433</b> | <b>5.0</b> | <b>0.7</b> | <b>ENSRNOT00000045433</b> | <b>„Similar to interferon-<math>\alpha</math>“</b>                                                                                                                           |         |
| NM_012968                 | 4.0        | 1.3        | Il1rap                    | interleukin 1 receptor accessory protein;                                                                                                                                    | [10]    |
| NM_212525                 | 3.9        | 4.7        | Tyrobp                    | TYRO protein tyrosine kinase binding protein; = DAP12; associates with TREM2. TREM2/DAP12 complexes trigger immune responses in macrophages and microglia; phagocytosis      | [16,17] |

|              |     |      |                  |                                                                                                                         |         |
|--------------|-----|------|------------------|-------------------------------------------------------------------------------------------------------------------------|---------|
| NM_031114    | 3.8 | 2.2  | S100a10          | regulation of plasminogen-dependent macrophage invasion                                                                 | [18]    |
| XM_001073024 | 3.2 | 1.0  | LOC690045        | similar to immunoreceptor Ly49si                                                                                        |         |
| NM_001105971 | 3.0 | 48.2 | Slamf9_predicted | SLAM family member 9 (predicted); leukocyte cell surface receptor                                                       | [19]    |
| NM_013169    | 3.0 | 2.2  | Cd3d             | component of CD3 complex on T cells                                                                                     |         |
| NM_133624    | 3.0 | 83.7 | Gbp2             | guanylate nucleotide binding protein 2; inhibits cell spreading                                                         | [20]    |
| BC061859     | 2.9 | 2.9  | Tcirg1           | T-cell, immune regulator 1; in T cells and macrophages; needed to acidify phagosomes; = TIRC7, recruits Ptpn6           | [21,22] |
| BC061858     | 2.9 | 0.8  | Ptbp1            | polypyrimidine tract binding protein 1; critical for turnover and subcellular distribution of CD40L mRNA                | [23]    |
| XM_344628    | 2.8 | 0.7  | LOC364775        | similar to interleukin 15 receptor alpha chain isoform 1C                                                               |         |
| NM_198769    | 2.8 | 7.5  | Tlr2             | Toll-like receptor 2;                                                                                                   | [10]    |
| NM_138913    | 2.6 | 3.6  | Oas1a            | 2'-5' oligoadenylate synthetase 1A; in antiviral signaling cascade                                                      | [24]    |
| NM_022634    | 2.5 | 4.4  | Lst1             | leucocyte specific transcript 1; possibly immuno-modulatory                                                             | [25]    |
| NM_057124    | 2.3 | 15.9 | P2ry6            | pyrimidinergic receptor P2Y, G-protein coupled, 6; in T cells and macrophages; inhibits activation of effector T cells. | [26,27] |
| NM_001031638 | 2.2 | 1.0  | Cd68             | on monocytes, macrophages, microglia, neutrophils;                                                                      | [10]    |
| NM_012854    | 2.1 | 0.8  | Il10             | interleukin 10                                                                                                          | [10]    |

|              |     |      |                 |                                                                                                                                                         |         |
|--------------|-----|------|-----------------|---------------------------------------------------------------------------------------------------------------------------------------------------------|---------|
| NM_001004226 | 1.9 | 1.2  | RGD1303130      | kidney predominant protein NCU-G1; lysosomal protein;                                                                                                   | [27]    |
| NM_001048045 | 1.9 | 1.0  | RT1-M5          | RT1 class Ib, locus M5;                                                                                                                                 |         |
| NM_175577    | 1.9 | 1.2  | Cd6             | CD6 antigen; preferentially activated in T cells; functions as pattern recognition receptor for microbial components; expression dependent on runx3.    | [28,29] |
| S79307       | 1.9 | 0.9  | S79307          | immunoglobulin heavy chain [rats, humanized lympholytic MoAb CAMPATH-1H, mRNA, 1465 nt].                                                                |         |
| NM_001105989 | 1.9 | 0.75 | Cr2_predicted   | complement receptor 2                                                                                                                                   | [10]    |
| XM_573983    | 1.9 | 1.2  | Tgfbi           | transforming growth factor, beta, induced;                                                                                                              | [10]    |
| NM_053383    | 1.8 | 1.0  | C1qr1           | complement factor C1qr1; classical pathway; in microglia                                                                                                | [30]    |
| NM_001109509 | 1.8 | 1.2  | Gpr84           | G protein-coupled receptor 84; on microglia; induced by pro-inflammatory cytokines like IL-1 and TNF- $\alpha$ ;                                        | [31]    |
| NM_001105840 | 1.8 | 1.1  | Rab5c_predicted | member RAS oncogene family predicted; in macrophages; induced by IL-6; needed for phagosome maturation                                                  | [32]    |
| NM_031609    | 1.8 | 1.2  | Nbl1            | neuroblastoma, suppression of tumorigenicity 1 (Nbl1); = DAN; secreted antagonist of bone morphogenic protein; acts as inhibitor of monocyte chemotaxis | [33]    |
| NM_053953    | 1.8 | 1.0  | Il1r2           | interleukin 1 receptor, type II (Il1r2)                                                                                                                 | [10]    |
| NM_001106554 | 1.7 | 1.0  | Il1f6_predicted | interleukin 1 family, member 6 (predicted) (Il1f6_predicted)                                                                                            | [10]    |

|              |     |     |                |                                                                                                                                                                                                                                                                                                           |              |
|--------------|-----|-----|----------------|-----------------------------------------------------------------------------------------------------------------------------------------------------------------------------------------------------------------------------------------------------------------------------------------------------------|--------------|
| NM_053372    | 1.7 | 1.7 | Slpi           | secretory leukocyte peptidase inhibitor; associated with MMP-2 and MMP-9 to promote migration; inhibits neutrophil apoptosis                                                                                                                                                                              | [34,35]      |
| NM_001105811 | 1.7 | 1.3 | Rilp_predicted | Rab interacting lysosomal protein                                                                                                                                                                                                                                                                         | [36]         |
| NM_053908    | 1.7 | 2.5 | Ptpn6          | protein tyrosine phosphatase, non-receptor type 6; = Shp-1; in neutrophils, dendritic cells, macrophages; controls neutrophil numbers and survival; regulates IL-6 and IL-1 production                                                                                                                    | [37-39]      |
| XM_344357    | 1.6 | 1.2 | XM_344357      | similar to T cell receptor V alpha 8.5;                                                                                                                                                                                                                                                                   |              |
| AJ004888     | 1.6 | 1.7 | RT1-Aw2        | MHC class Ib;                                                                                                                                                                                                                                                                                             |              |
| NM_031634    | 1.6 | 4.2 | Mefv           | Mediterranean fever; expressed in mature neutrophils and is predominantly upregulated in response to IFN- $\gamma$ or TNF- $\alpha$ , but can also be induced by IFN- $\alpha$                                                                                                                            | [40]         |
| XM_001053627 | 1.6 | 2.1 | LOC498279      | similar to high affinity immunoglobulin epsilon receptor gamma-subunit precursor (Fc $\epsilon$ Rlg); when complexed with immunoglobulin-like transcript 7 and when signaling is initiated via this complex, production of IFN and proinflammatory cytokines by plasmacytoid dendritic cells is inhibited | [41]         |
| XM_227483    | 1.6 | 1.1 | Etv3           | ets variant gene 3 (ETV3), upregulated by interleukin 10; similar to BXMAS1-like protein 2;                                                                                                                                                                                                               | [42]         |
| NM_001007622 | 1.4 | 1.6 | Pdlim2         | PDZ and LIM domain 2 (Pdlim2), in macrophages; overexpression associated with enhanced adhesion and increased nuclear activity of NF-kappaB; limits the production of proinflammatory cytokines                                                                                                           | [43]<br>[44] |

|                        |     |     |                        |                                                                                                                                                                                             |      |
|------------------------|-----|-----|------------------------|---------------------------------------------------------------------------------------------------------------------------------------------------------------------------------------------|------|
| M87786                 | 1.4 | 1.6 | M87786                 | immunoglobulin light chain variable region, complementarity-determining region, partial                                                                                                     |      |
| NM_030833              | 1.4 | 2.2 | Ifitm2                 | interferon induced transmembrane protein 2; anti-viral                                                                                                                                      | [45] |
| AF436847               | 1.4 | 1.0 | Cfh                    | Complement factor H; has complement inhibitory activity                                                                                                                                     | [46] |
| NM_001008840           | 1.3 | 1.7 | RT1-CE2                | RT1 class I, CE2;                                                                                                                                                                           |      |
| NM_130425              | 1.3 | 1.3 | Runx3                  | runt-related transcription factor 3; one of its functions: regulation of CD6 expression                                                                                                     | [29] |
| ENSRNOT<br>00000059672 | 1.3 | 1.1 | ENSRNOT<br>00000059672 | „similar to granzyme N“                                                                                                                                                                     |      |
| NM_176077              | 1.2 | 1.0 | G6pc3                  | glucose 6 phosphatase, catalytic, 3; essential for neutrophil function and survival                                                                                                         | [47] |
| NM_001008384           | 1.2 | 1.5 | Rac2                   | RAS-related C3 botulinum substrate 2; required for the formation of neutrophil extracellular traps                                                                                          | [48] |
| NM_053492              | 1.2 | 3.8 | Cdw92                  | CDW92 antigen, transcript variant 2; stably expressed on monocytes; regulates specific subsets of dendritic cells                                                                           | [49] |
| NM_001007008           | 0.4 | 0.4 | Ndg2                   | Nur77 downstream gene 2 (Ndg2); implicated in negative selection of thymocytes; Nur77-mediated T cell apoptosis involves Bcl-2 independent transcriptional activation of apoptotic pathways | [50] |
| NM_001109175           | 0.4 | 0.7 | Ccno                   | cyclin O; responsible for apoptosis induction in lymphoid cells                                                                                                                             | [51] |

|           |     |     |           |                                             |  |
|-----------|-----|-----|-----------|---------------------------------------------|--|
| XM_344339 | 0.3 | 1.8 | XM_344339 | T cell receptor V-alpha J-alpha (LOC364314) |  |
|-----------|-----|-----|-----------|---------------------------------------------|--|

fold changes (fc) above 1 indicate an upregulation in gene expression, fc below 1 indicate a downregulation.

EAE = mean value of EAE<sub>col</sub> and EAE<sub>cop</sub> ; all T = mean value of all T cell mediated diseases (i.e. ENMO, EAE<sub>col</sub>, EAE<sub>cop</sub>)

all non-T = mean value of all non-inflammatory controls (i.e. healthy control animals, animals injected with NMO-IgG only, animals injected with control IgG only).
