# Supplementary material for: Experimental Neuromyelitis Optica Induces a Type I Interferon Signature in the Spinal Cord
Source: PubMed Central journal article supplement (PMC4798752; doi:10.1371/journal.pone.0151244), 2016-03-18
Supplement: pone.0151244.s003.pdf [file pone.0151244.s003.pdf]

**S3 Table. Footprints of the action/production of type I interferons in experimental autoimmune encephalomyelitis.**

| <b>Target Id</b> | <b>fc EAE<sub>coP</sub> (*: EAE<sub>coI</sub> instead of EAE<sub>coP</sub>) /<br/>all non-T</b> | <b>Gene symbol</b> |
|------------------|-------------------------------------------------------------------------------------------------|--------------------|
| NM_133624        | 72.9                                                                                            | GBP2               |
| CF111193         | 28.7                                                                                            | B2m                |
| NM_012708        | 9.4                                                                                             | Psmb9              |
| NM_199093        | 3.7                                                                                             | Serpin G1          |
| NM_001030026     | 3.4                                                                                             | Ifi30              |
| NM_001011921     | 3.2                                                                                             | PDGFRL             |
| NM_013069        | 3.0                                                                                             | CD74               |
| NM_138913        | 2.5                                                                                             | Oas1a              |
| NM_030833        | 2.3                                                                                             | Ifitm2             |
| NM_139341        | 1.9                                                                                             | Slc15a3            |
| BQ196649         | *1.7                                                                                            | Gpx2               |
| NM_198134        | 1.6                                                                                             | Bst2               |
| NM_001024755     | 1.6                                                                                             | Ube2l6             |
| NM_001008321     | 1.5                                                                                             | Gadd45b            |
| NM_001109514     | 1.4                                                                                             | Slc25a28           |
| NM_001013895     | *1.4                                                                                            | Prkd2              |
| NM_057124        | 1.3                                                                                             | P2ry6              |
| NM_001037353     | 1.1                                                                                             | Timp1              |

Type I interferon stimulated genes in EAE were identified using the list of 31 type I interferon stimulated genes identified in ENMO (see table 3).

Fold changes (fc) > 1 indicate an upregulation in gene expression.

all non-T = mean value of all non-inflammatory controls (i.e. healthy control animals, animals injected with NMO-IgG only, animals injected with control IgG only).
