# Supplementary material for: Experimental Neuromyelitis Optica Induces a Type I Interferon Signature in the Spinal Cord
Source: PubMed Central journal article supplement (PMC4798752; doi:10.1371/journal.pone.0151244), 2016-03-18
Supplement: pone.0151244.s004.pdf [file pone.0151244.s004.pdf]

#### S4 Table: Supplementary references

1. Takata Y, Hamada D, Miyatake K, Nakano S, Shinomiya F, Scfe CR, et al. (2007) Genetic association between the PRKCH gene encoding protein kinase Ceta isozyme and rheumatoid arthritis in the Japanese population. *Arthritis Rheum* 56: 30-42.
2. Taki T, Akiyama M, Saito S, Ono R, Taniwaki M, Kato Y, et al. (2005) The MYO1F, unconventional myosin type 1F, gene is fused to MLL in infant acute monocytic leukemia with a complex translocation involving chromosomes 7, 11, 19 and 22. *Oncogene* 24: 5191-5197.
3. Agapova OA, Ricard CS, Salvador-Silva M, Hernandez MR (2001) Expression of matrix metalloproteinases and tissue inhibitors of metalloproteinases in human optic nerve head astrocytes. *Glia* 33: 205-216.
4. Welser-Alves JV, Crocker SJ, Milner R (2011) A dual role for microglia in promoting tissue inhibitor of metalloproteinase (TIMP) expression in glial cells in response to neuroinflammatory stimuli. *J Neuroinflammation* 8: 61.
5. Barnum SR, Ishii Y, Agrawal A, Volanakis JE (1992) Production and interferon-gamma-mediated regulation of complement component C2 and factors B and D by the astrogloma cell line U105-MG. *Biochem J* 287 ( Pt 2): 595-601.
6. Armstrong PB, Quigley JP (1999) Alpha2-macroglobulin: an evolutionarily conserved arm of the innate immune system. *Dev Comp Immunol* 23: 375-390.
7. Taniguchi T, Takaoka A (2001) A weak signal for strong responses: interferon-alpha/beta revisited. *Nat Rev Mol Cell Biol* 2: 378-386.
8. Pasinetti GM, Hassler M, Stone D, Finch CE (1999) Glial gene expression during aging in rat striatum and in long-term responses to 6-OHDA lesions. *Synapse* 31: 278-284.
9. Van Beek J, Chan P, Bernaudin M, Petit E, MacKenzie ET, Fontaine M (2000) Glial responses, clusterin, and complement in permanent focal cerebral ischemia in the mouse. *Glia* 31: 39-50.
10. Hoffmann R, Valencia A (2004) A gene network for navigating the literature. *Nat Genet* 36: 664.
11. Krausgruber T, Blazek K, Smallie T, Alzabin S, Lockstone H, Sahgal N, et al. (2011) IRF5 promotes inflammatory macrophage polarization and TH1-TH17 responses. *Nat Immunol* 12: 231-238.
12. Yokoyama T, Kobayashi T, Yamamoto K, Yamagata A, Oofusa K, Yoshie H (2010) Proteomic profiling of human neutrophils in relation to immunoglobulin G Fc receptor IIIb polymorphism. *J Periodontal Res* 45: 780-787.
13. Esser J, Rakonjac M, Hofmann B, Fischer L, Provost P, Schneider G, et al. (2010) Coactosin-like protein functions as a stabilizing chaperone for 5-lipoxygenase: role of tryptophan 102. *Biochem J* 425: 265-274.
14. Eijkelkamp N, Heijnen CJ, Lucas A, Premont RT, Elsenbruch S, Schedlowski M, et al. (2007) G protein-coupled receptor kinase 6 controls chronicity and severity of dextran sodium sulphate-induced colitis in mice. *Gut* 56: 847-854.
15. Satoh J, Obayashi S, Misawa T, Tabunoki H, Yamamura T, Arima K, et al. (2008) Neuromyelitis optica/Devic's disease: gene expression profiling of brain lesions. *Neuropathology* 28: 561-576.
16. Paloneva J, Mandelin J, Kiialainen A, Bohling T, Prudlo J, Hakola P, et al. (2003) DAP12/TREM2 deficiency results in impaired osteoclast differentiation and osteoporotic features. *J Exp Med* 198: 669-675.
17. Paloneva J, Manninen T, Christman G, Hovanes K, Mandelin J, Adolfsson R, et al. (2002) Mutations in two genes encoding different subunits of a receptor signaling complex result in an identical disease phenotype. *Am J Hum Genet* 71: 656-662.
18. O'Connell PA, Surette AP, Liwski RS, Svenningsson P, Waisman DM (2010) S100A10 regulates plasminogen-dependent macrophage invasion. *Blood* 116: 1136-1146.
19. Fennelly JA, Tiwari B, Davis SJ, Evans EJ (2001) CD2F-10: a new member of the CD2 subset of the immunoglobulin superfamily. *Immunogenetics* 53: 599-602.

20. Messmer-Blust AF, Balasubramanian S, Gorbacheva VY, Jeyaratnam JA, Vestal DJ (2010) The interferon-gamma-induced murine guanylate-binding protein-2 inhibits rac activation during cell spreading on fibronectin and after platelet-derived growth factor treatment: role for phosphatidylinositol 3-kinase. *Mol Biol Cell* 21: 2514-2528.
21. Sun-Wada GH, Tabata H, Kawamura N, Aoyama M, Wada Y (2009) Direct recruitment of H<sup>+</sup>-ATPase from lysosomes for phagosomal acidification. *J Cell Sci* 122: 2504-2513.
22. Bulwin GC, Walter S, Schlawinsky M, Heinemann T, Schulze A, Hohne W, et al. (2008) HLA-DR alpha 2 mediates negative signalling via binding to Tirc7 leading to anti-inflammatory and apoptotic effects in lymphocytes in vitro and in vivo. *PLoS One* 3: e1576.
23. Matus-Nicodemus R, Vavassori S, Castro-Faix M, Valentin-Acevedo A, Singh K, Marcelli V, et al. (2011) Polypyrimidine tract-binding protein is critical for the turnover and subcellular distribution of CD40 ligand mRNA in CD4<sup>+</sup> T cells. *J Immunol* 186: 2164-2171.
24. Austin BA, James C, Silverman RH, Carr DJ (2005) Critical role for the oligoadenylate synthetase/RNase L pathway in response to IFN-beta during acute ocular herpes simplex virus type 1 infection. *J Immunol* 175: 1100-1106.
25. Mulcahy H, O'Rourke KP, Adams C, Molloy MG, O'Gara F (2006) LST1 and NCR3 expression in autoimmune inflammation and in response to IFN-gamma, LPS and microbial infection. *Immunogenetics* 57: 893-903.
26. Lattin JE, Schroder K, Su AI, Walker JR, Zhang J, Wiltshire T, et al. (2008) Expression analysis of G Protein-Coupled Receptors in mouse macrophages. *Immunome Res* 4: 5.
27. Giannattasio G, Ohta S, Boyce JR, Xing W, Balestrieri B, Boyce JA (2011) The purinergic G protein-coupled receptor 6 inhibits effector T cell activation in allergic pulmonary inflammation. *J Immunol* 187: 1486-1495.
28. Sarrias MR, Farnos M, Mota R, Sanchez-Barbero F, Ibanez A, Gimferrer I, et al. (2007) CD6 binds to pathogen-associated molecular patterns and protects from LPS-induced septic shock. *Proc Natl Acad Sci U S A* 104: 11724-11729.
29. Arman M, Aguilera-Montilla N, Mas V, Puig-Kroger A, Pignatelli M, Guigo R, et al. (2009) The human CD6 gene is transcriptionally regulated by RUNX and Ets transcription factors in T cells. *Mol Immunol* 46: 2226-2235.
30. Lynch NJ, Willis CL, Nolan CC, Roscher S, Fowler MJ, Weihe E, et al. (2004) Microglial activation and increased synthesis of complement component C1q precedes blood-brain barrier dysfunction in rats. *Mol Immunol* 40: 709-716.
31. Bouchard C, Page J, Bedard A, Tremblay P, Vallieres L (2007) G protein-coupled receptor 84, a microglia-associated protein expressed in neuroinflammatory conditions. *Glia* 55: 790-800.
32. Bhattacharya M, Ojha N, Solanki S, Mukhopadhyay CK, Madan R, Patel N, et al. (2006) IL-6 and IL-12 specifically regulate the expression of Rab5 and Rab7 via distinct signaling pathways. *EMBO J* 25: 2878-2888.
33. Chen B, Blair DG, Plisov S, Vasiliev G, Perantoni AO, Chen Q, et al. (2004) Cutting edge: bone morphogenetic protein antagonists Dnm/Gremlin and Dan interact with Slits and act as negative regulators of monocyte chemotaxis. *J Immunol* 173: 5914-5917.
34. Subramaniyam D, Hollander C, Westin U, Erjefalt J, Stevens T, Janciauskiene S (2011) Secretory leukocyte protease inhibitor inhibits neutrophil apoptosis. *Respirology* 16: 300-307.
35. Choi BD, Jeong SJ, Wang G, Park JJ, Lim DS, Kim BH, et al. (2011) Secretory leukocyte protease inhibitor is associated with MMP-2 and MMP-9 to promote migration and invasion in SNU638 gastric cancer cells. *Int J Mol Med* 28: 527-534.
36. Colucci AM, Spinosa MR, Bucci C (2005) Expression, assay, and functional properties of RILP. *Methods Enzymol* 403: 664-675.
37. Nesterovitch AB, Szanto S, Gonda A, Bardos T, Kis-Toth K, Adarichev VA, et al. (2011) Spontaneous insertion of a b2 element in the ptpn6 gene drives a systemic autoinflammatory disease in mice resembling neutrophilic dermatosis in humans. *Am J Pathol* 178: 1701-1714.
38. Rego D, Kumar A, Nilchi L, Wright K, Huang S, Kozlowski M (2011) IL-6 production is positively regulated by two distinct Src homology domain 2-containing tyrosine phosphatase-1 (SHP-1)-dependent CCAAT/enhancer-binding protein beta and NF-kappaB pathways and an SHP-1-

- independent NF-kappaB pathway in lipopolysaccharide-stimulated bone marrow-derived macrophages. *J Immunol* 186: 5443-5456.
39. Ramachandran IR, Song W, Lapteva N, Seethammagari M, Slawin KM, Spencer DM, et al. (2011) The phosphatase SRC homology region 2 domain-containing phosphatase-1 is an intrinsic central regulator of dendritic cell function. *J Immunol* 186: 3934-3945.
  40. Centola M, Wood G, Frucht DM, Galon J, Aringer M, Farrell C, et al. (2000) The gene for familial Mediterranean fever, MEFV, is expressed in early leukocyte development and is regulated in response to inflammatory mediators. *Blood* 95: 3223-3231.
  41. Cao W, Bover L, Cho M, Wen X, Hanabuchi S, Bao M, et al. (2009) Regulation of TLR7/9 responses in plasmacytoid dendritic cells by BST2 and ILT7 receptor interaction. *J Exp Med* 206: 1603-1614.
  42. El Kasmi KC, Smith AM, Williams L, Neale G, Panopoulos AD, Watowich SS, et al. (2007) Cutting edge: A transcriptional repressor and corepressor induced by the STAT3-regulated anti-inflammatory signaling pathway. *J Immunol* 179: 7215-7219.
  43. Healy NC, O'Connor R (2009) Sequestration of PDLIM2 in the cytoplasm of monocytic/macrophage cells is associated with adhesion and increased nuclear activity of NF-kappaB. *J Leukoc Biol* 85: 481-490.
  44. Tanaka T, Grusby MJ, Kaisho T (2007) PDLIM2-mediated termination of transcription factor NF-kappaB activation by intranuclear sequestration and degradation of the p65 subunit. *Nat Immunol* 8: 584-591.
  45. Schoggins JW, Wilson SJ, Panis M, Murphy MY, Jones CT, Bieniasz P, et al. (2011) A diverse range of gene products are effectors of the type I interferon antiviral response. *Nature* 472: 481-485.
  46. Ito S, Tamura N (1983) Inhibition of classical C5 convertase in the complement system by factor H. *Immunology* 50: 631-635.
  47. Cheung YY, Kim SY, Yiu WH, Pan CJ, Jun HS, Ruef RA, et al. (2007) Impaired neutrophil activity and increased susceptibility to bacterial infection in mice lacking glucose-6-phosphatase-beta. *J Clin Invest* 117: 784-793.
  48. Lim MB, Kuiper JW, Katchky A, Goldberg H, Glogauer M (2011) Rac2 is required for the formation of neutrophil extracellular traps. *J Leukoc Biol* 90: 771-776.
  49. Wille S, Szekeres A, Majdic O, Prager E, Staffler G, Stockl J, et al. (2001) Characterization of CDw92 as a member of the choline transporter-like protein family regulated specifically on dendritic cells. *J Immunol* 167: 5795-5804.
  50. Rajpal A, Cho YA, Yelent B, Koza-Taylor PH, Li D, Chen E, et al. (2003) Transcriptional activation of known and novel apoptotic pathways by Nur77 orphan steroid receptor. *EMBO J* 22: 6526-6536.
  51. Roig MB, Roset R, Ortet L, Balsiger NA, Anfosso A, Cabellos L, et al. (2009) Identification of a novel cyclin required for the intrinsic apoptosis pathway in lymphoid cells. *Cell Death Differ* 16: 230-243.
